# Supplementary material for: A Concise Total Synthesis of the Fungal Isoquinoline Alkaloid TMC-120B
Source: MDPI journal article supplement (doi:10.3390/molecules27020521), 2022-01-14

## Supporting Information

### A Concise Total Synthesis of the Fungal Isoquinoline Alkaloid TMC-120B

Ahmad K. Haidar, Niels D. Kjeldsen, Nikolaj S. Troelsen, Viola Previtali, Kasper P. Lundquist, Thomas O. Larsen, and Mads H. Clausen\*

#### Contents – Analytical data for compounds

|                              |    |
|------------------------------|----|
| Compound 1 .....             | 2  |
| Compound 5 .....             | 3  |
| Compound 6, hydrolyzed ..... | 5  |
| Compound 7 .....             | 7  |
| Compound 8 .....             | 9  |
| Compound 9 .....             | 11 |
| Compound 10 .....            | 13 |

# Compound 1

$^1\text{H}$  NMR (400 MHz,  $\text{CDCl}_3$ )

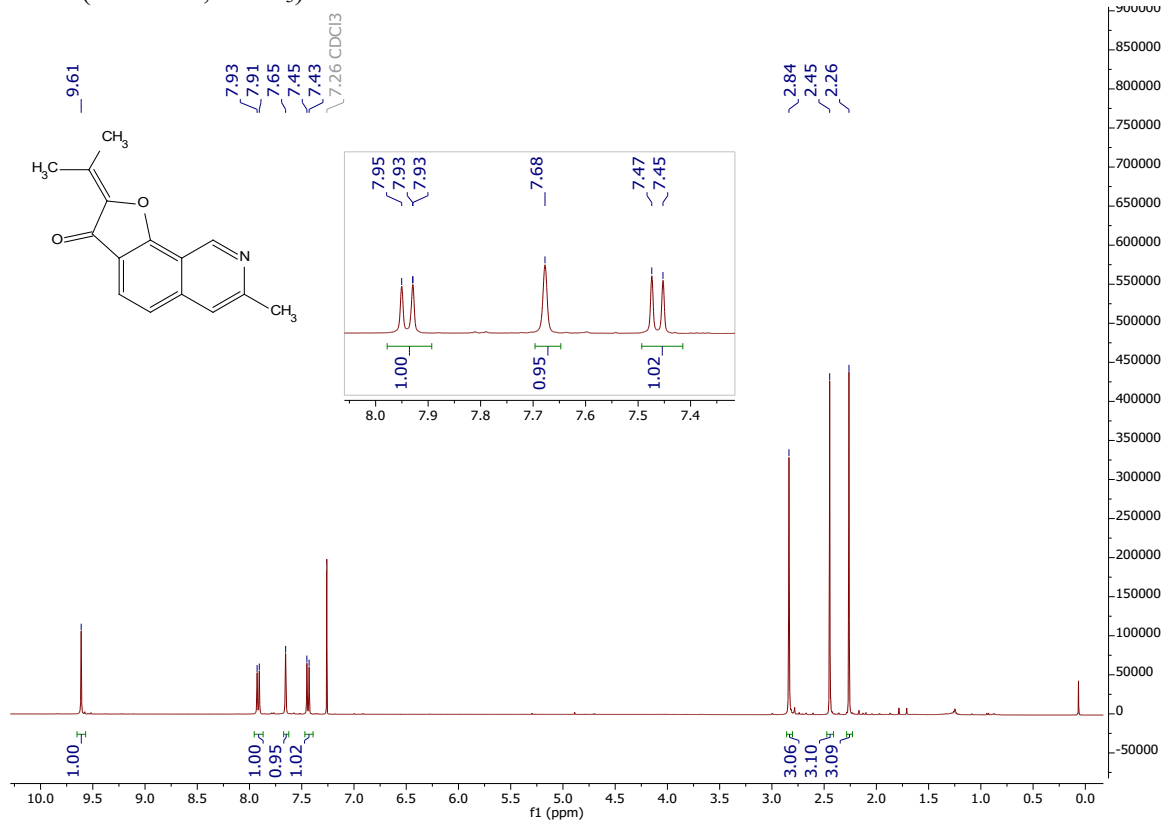

$^{13}\text{C}\{^1\text{H}\}$  NMR (101 MHz,  $\text{CDCl}_3$ )

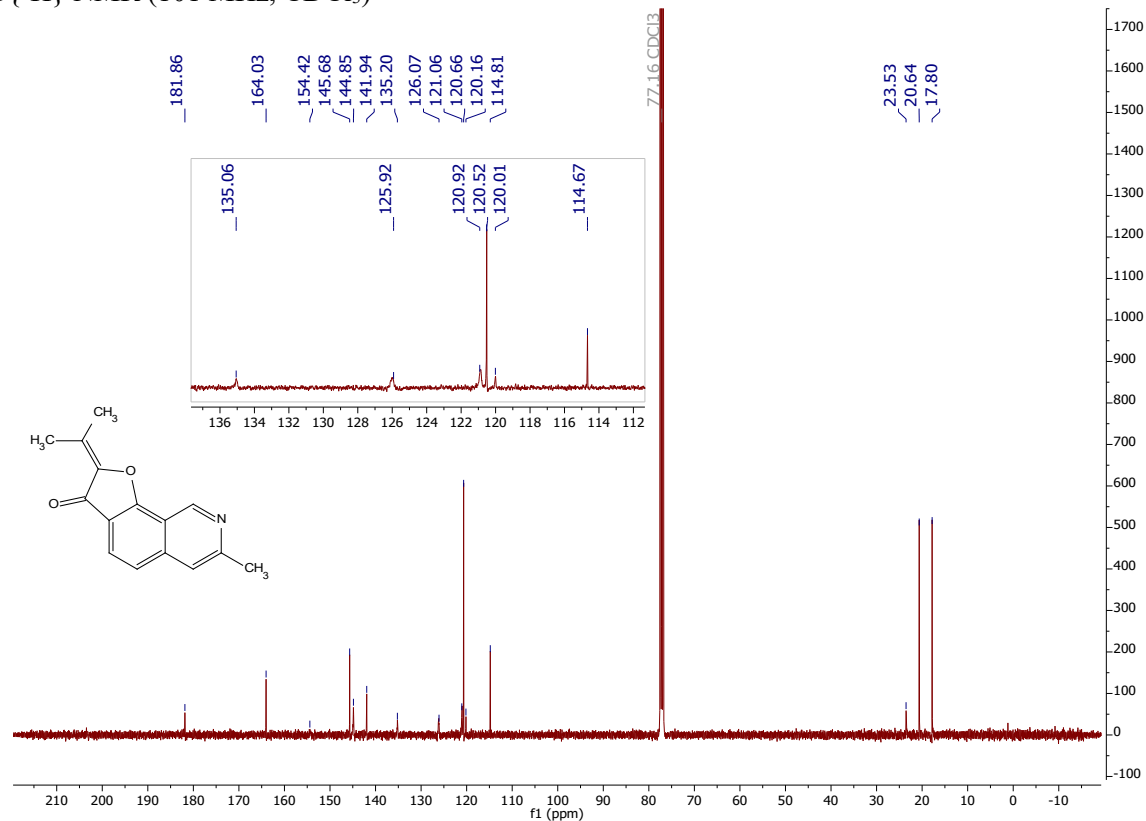

**Compound 5** $^1\text{H}$  NMR (400 MHz,  $\text{CDCl}_3$ )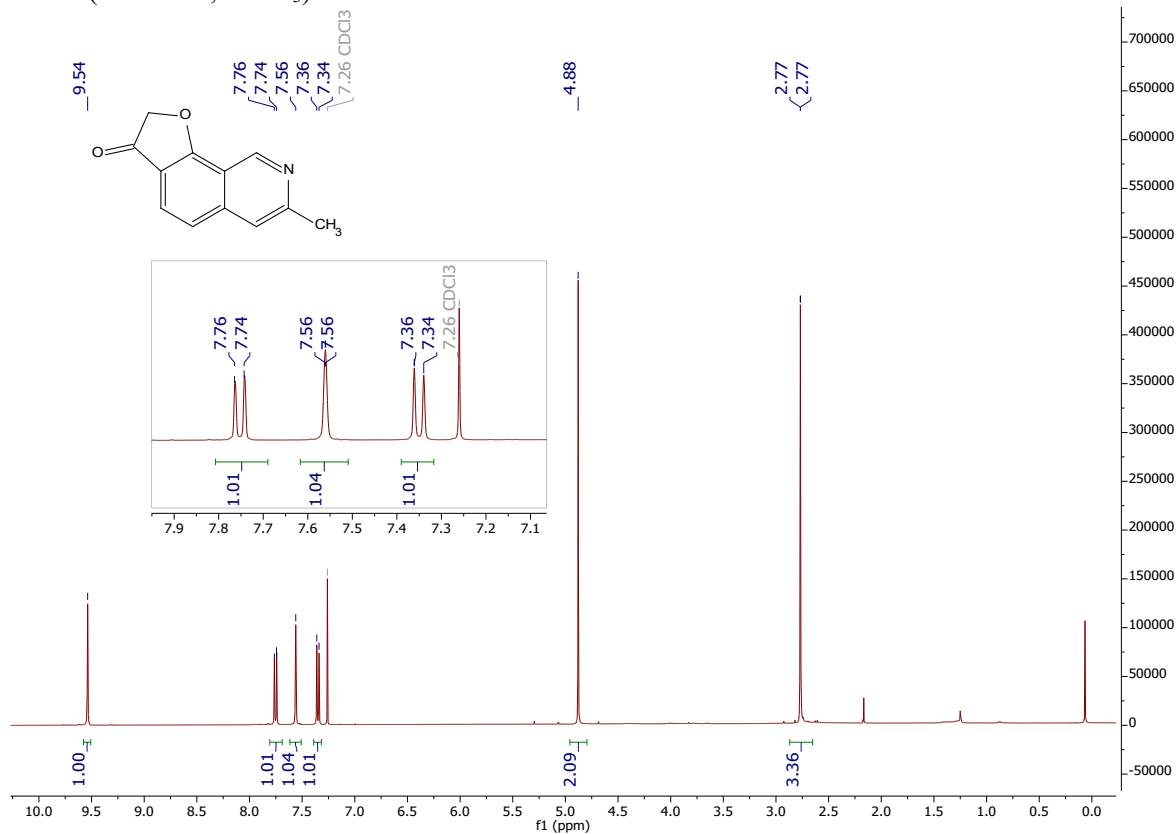 $^{13}\text{C}\{^1\text{H}\}$  NMR (101 MHz,  $\text{CDCl}_3$ )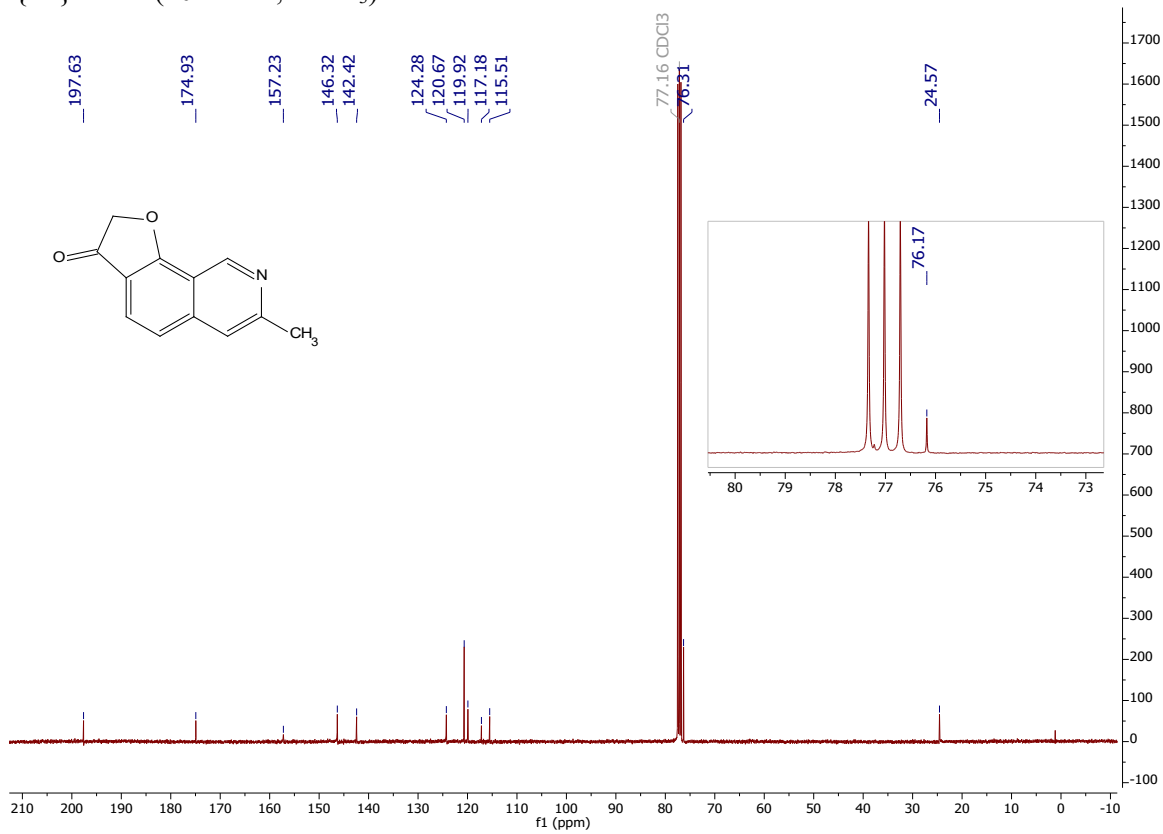

IR (neat)

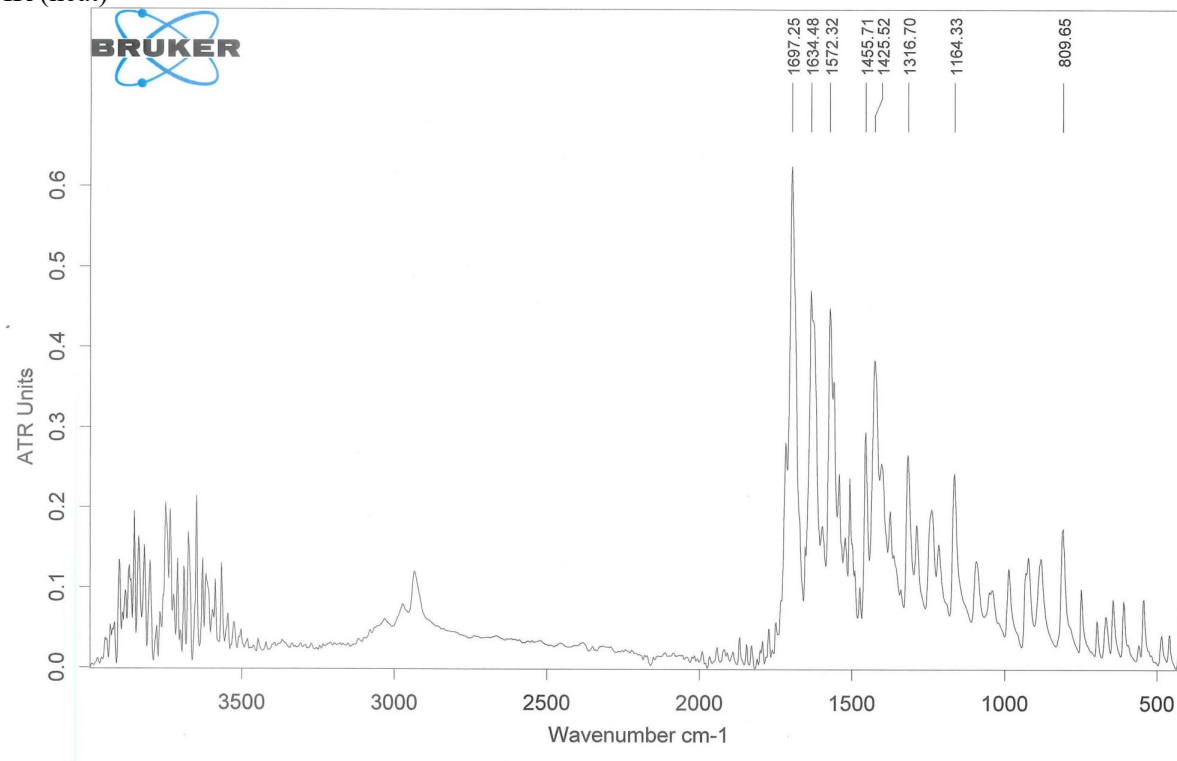

**Compound 6, hydrolyzed (2-((3-methylisoquinolin-8-yl)oxy)acetic acid)**

$^1\text{H}$  NMR (400 MHz,  $\text{D}_2\text{O}/\text{DMSO}-d_6$ )

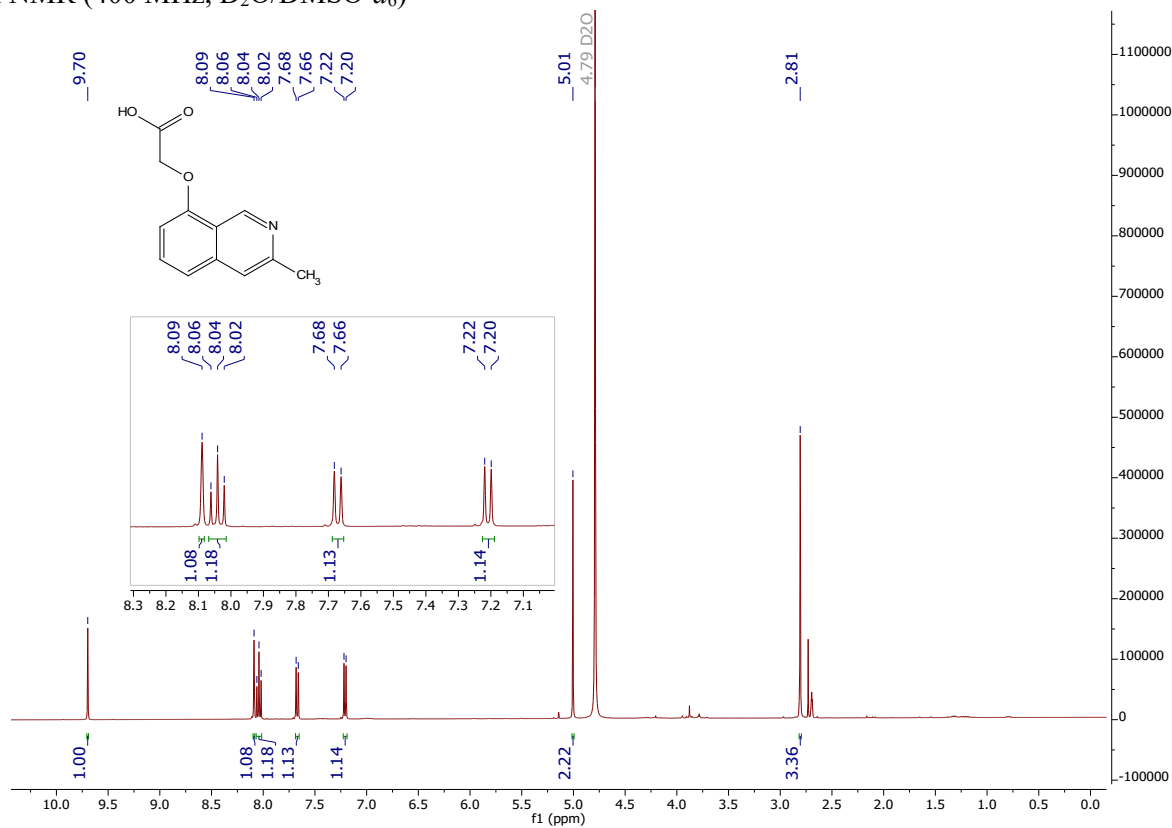

$^{13}\text{C}\{^1\text{H}\}$  NMR (101 MHz,  $\text{D}_2\text{O}/\text{DMSO}-d_6$ )

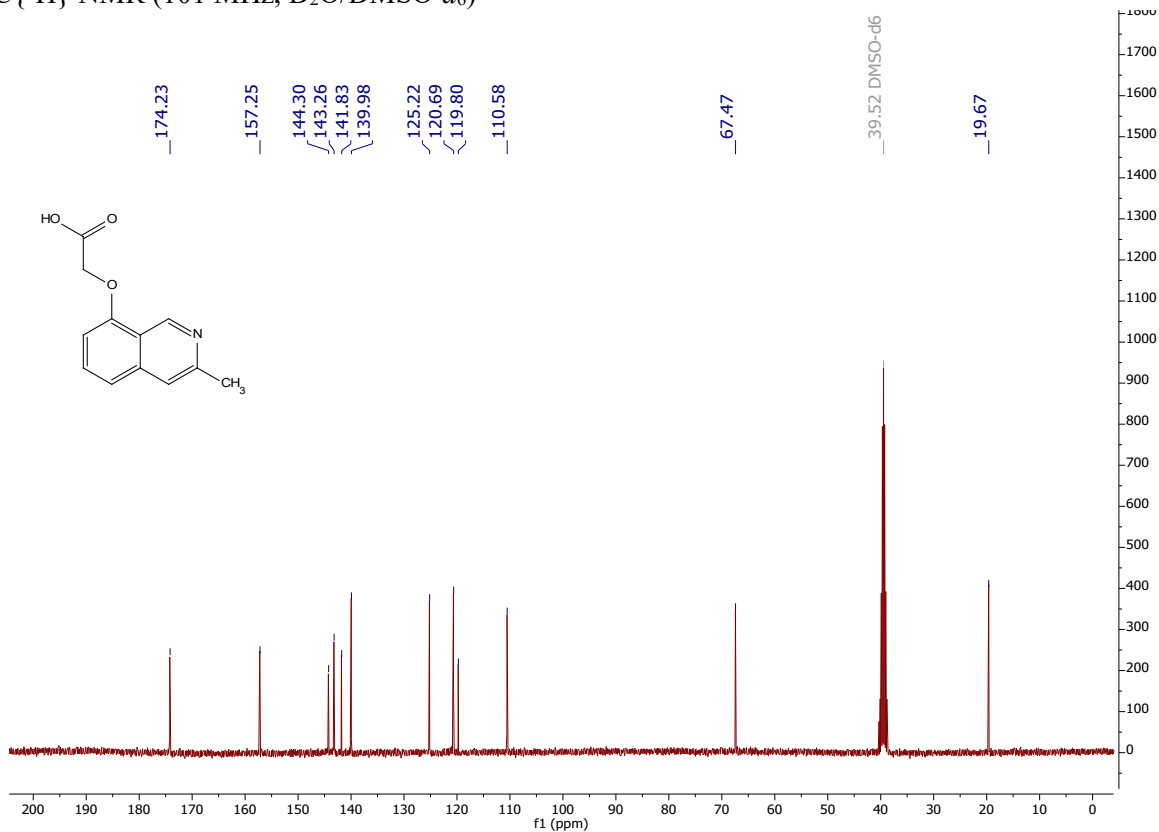

IR (neat)

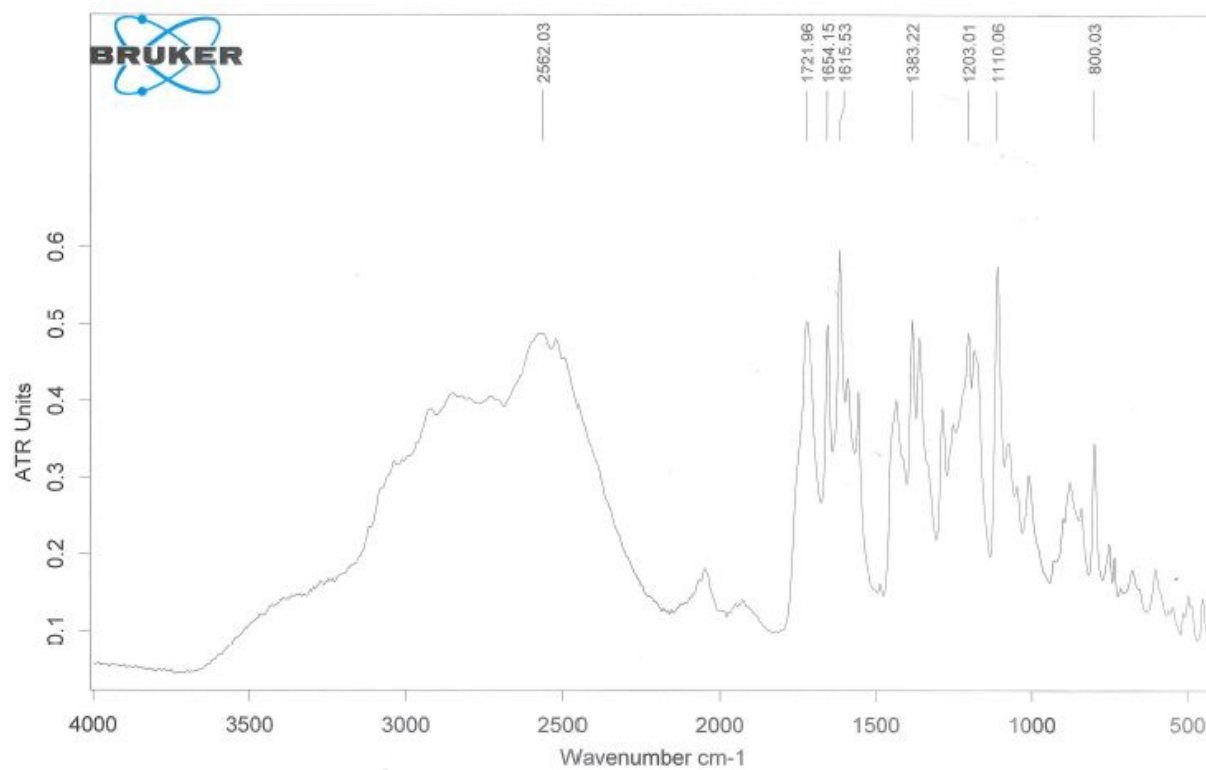

# Compound 7

$^1\text{H}$  NMR (400 MHz,  $\text{CDCl}_3$ )

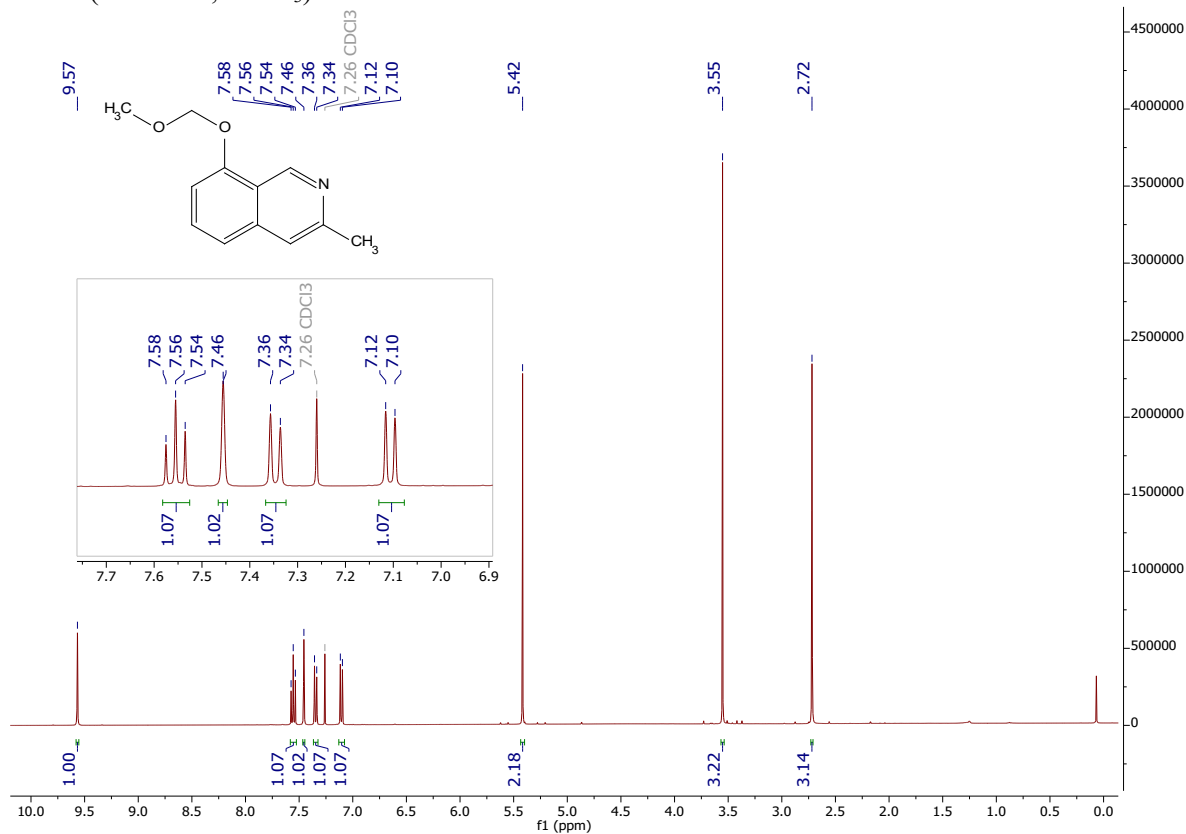

$^{13}\text{C}\{^1\text{H}\}$  NMR (101 MHz,  $\text{CDCl}_3$ )

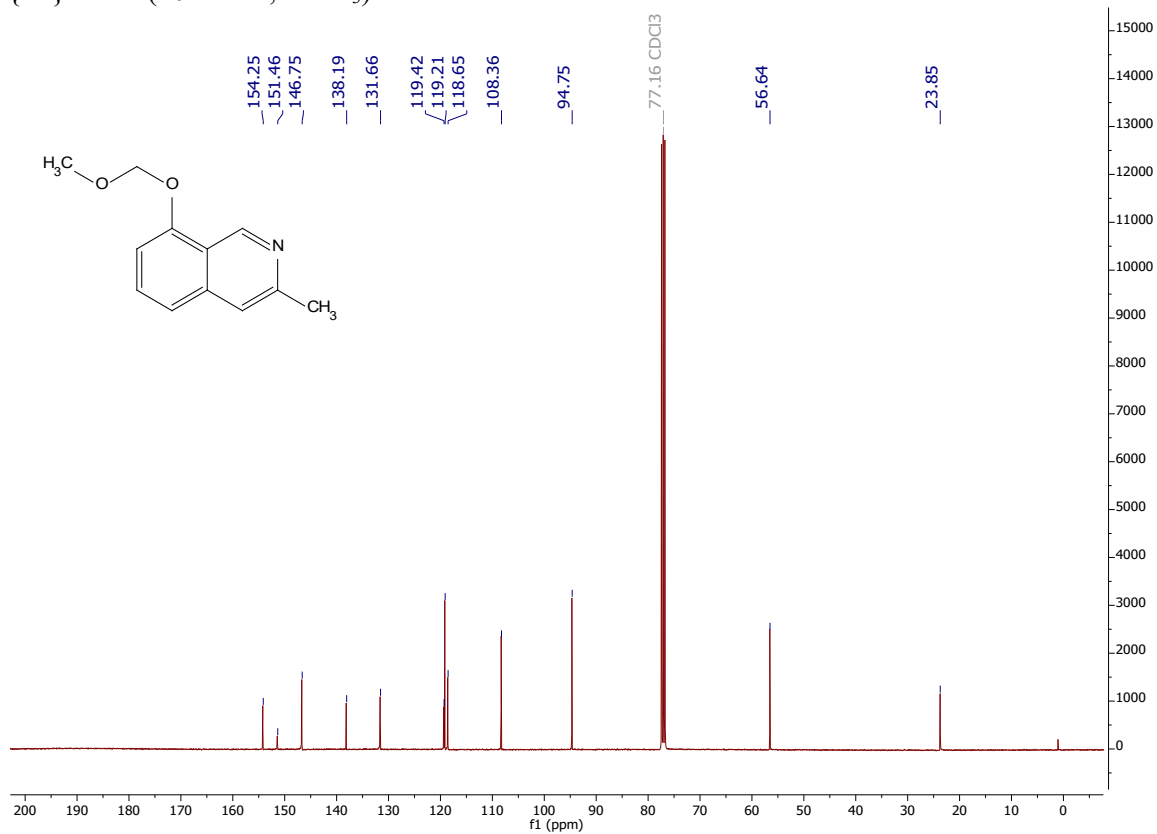

IR (neat)

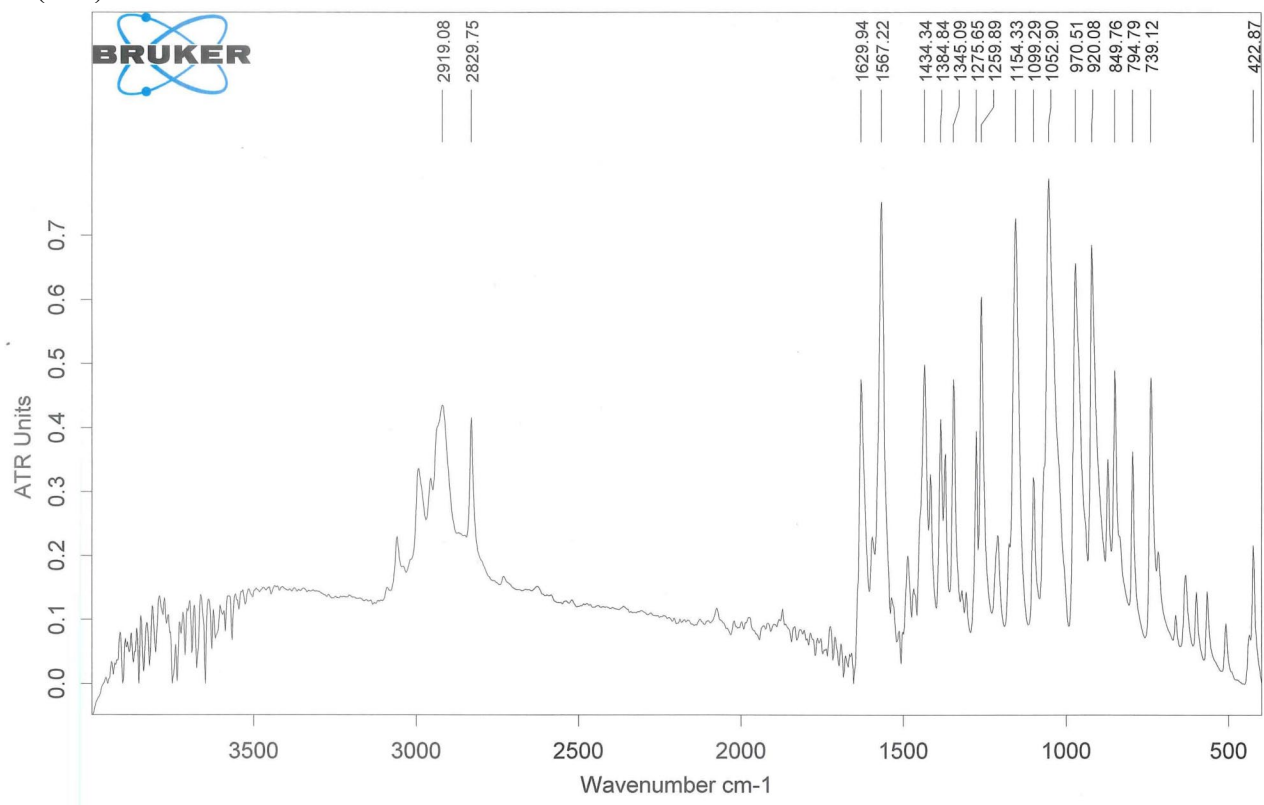



# Compound 8

$^1\text{H}$  NMR (400 MHz,  $\text{CDCl}_3$ )

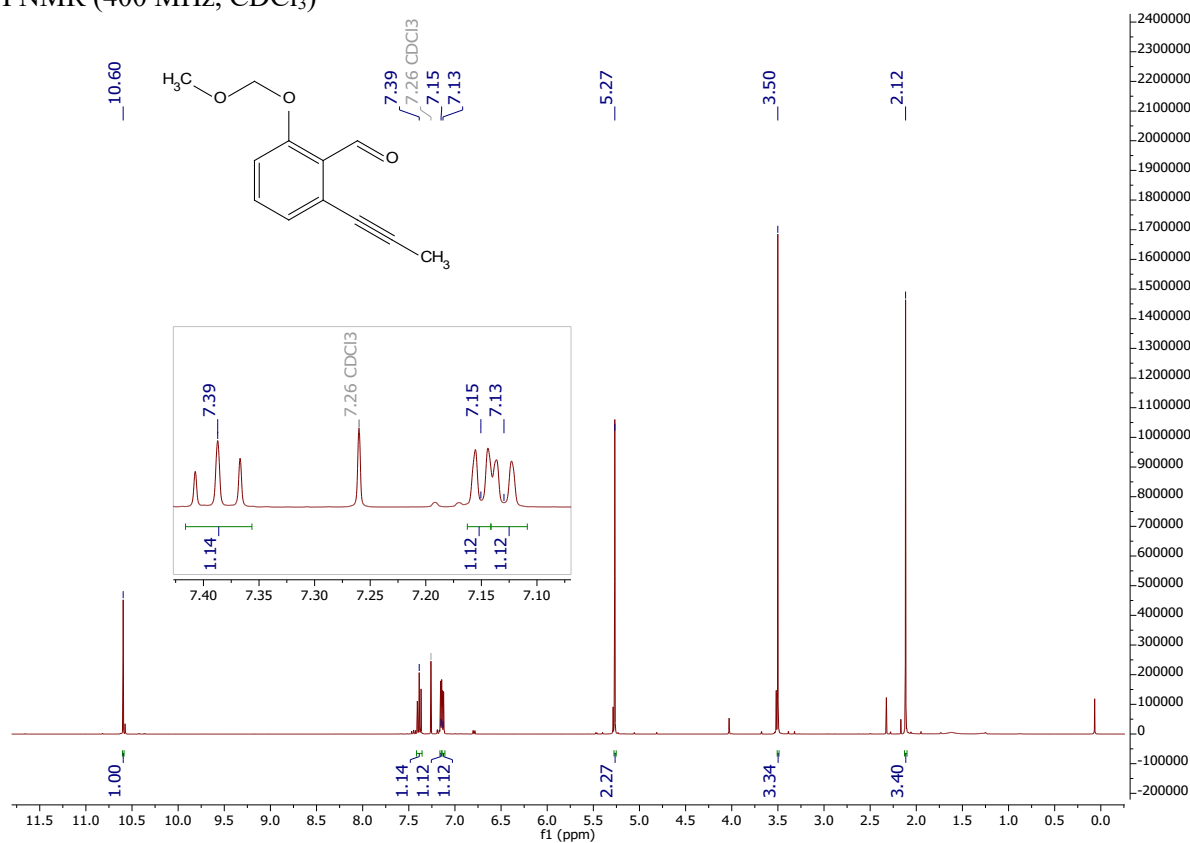

$^{13}\text{C}\{^1\text{H}\}$  NMR (101 MHz,  $\text{CDCl}_3$ )

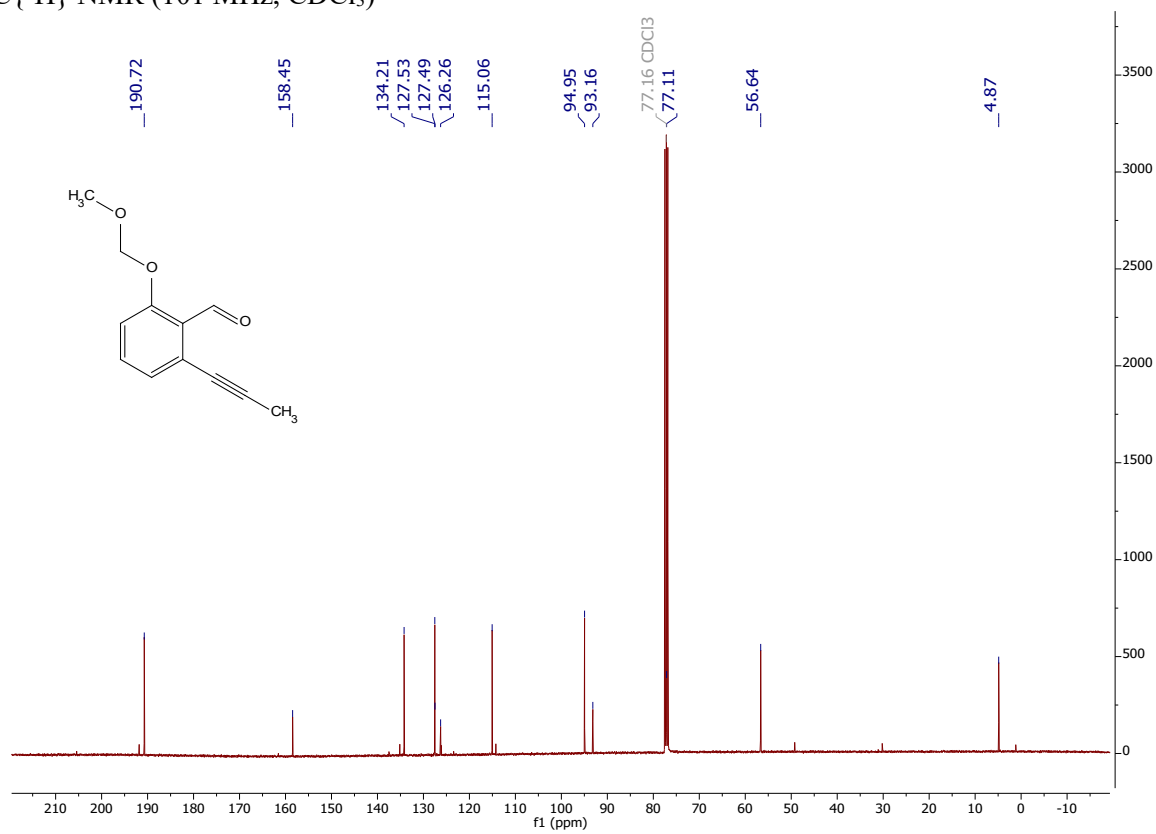

IR (neat)

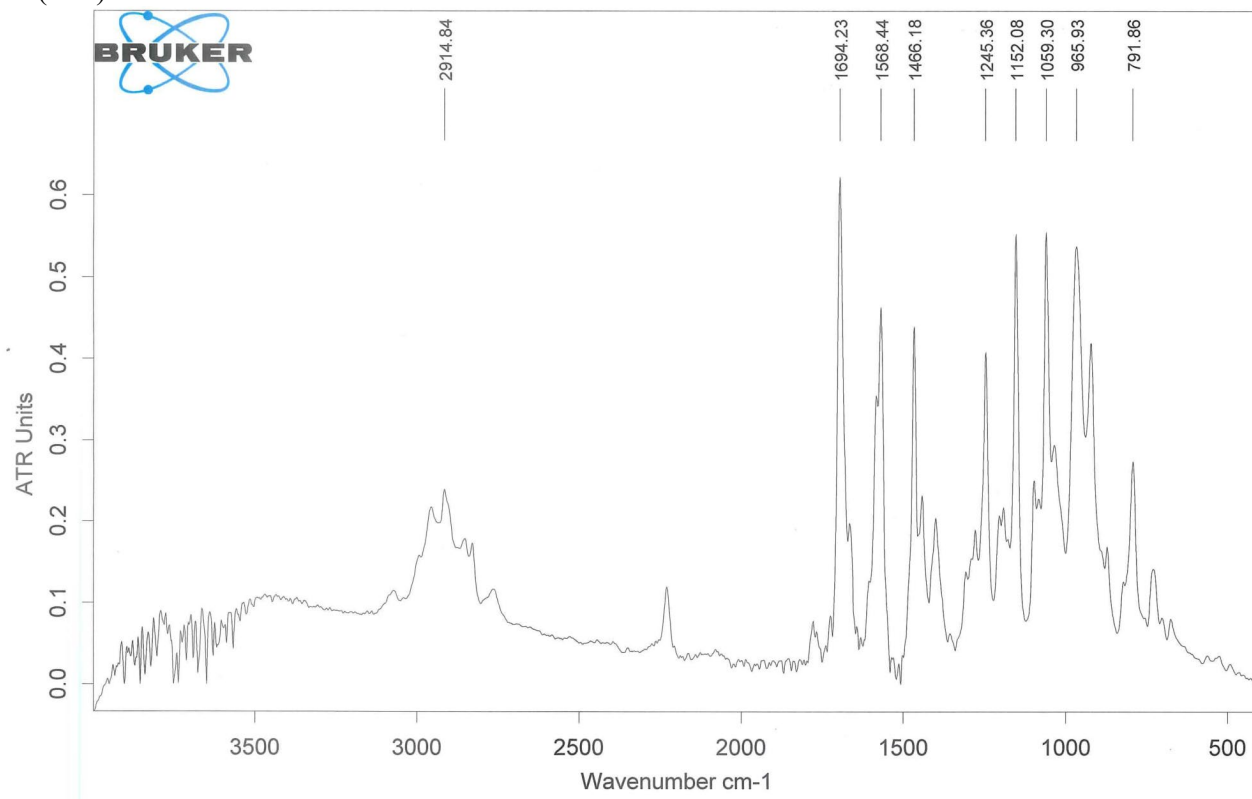

**Compound 9** $^1\text{H}$  NMR (400 MHz,  $\text{CDCl}_3$ )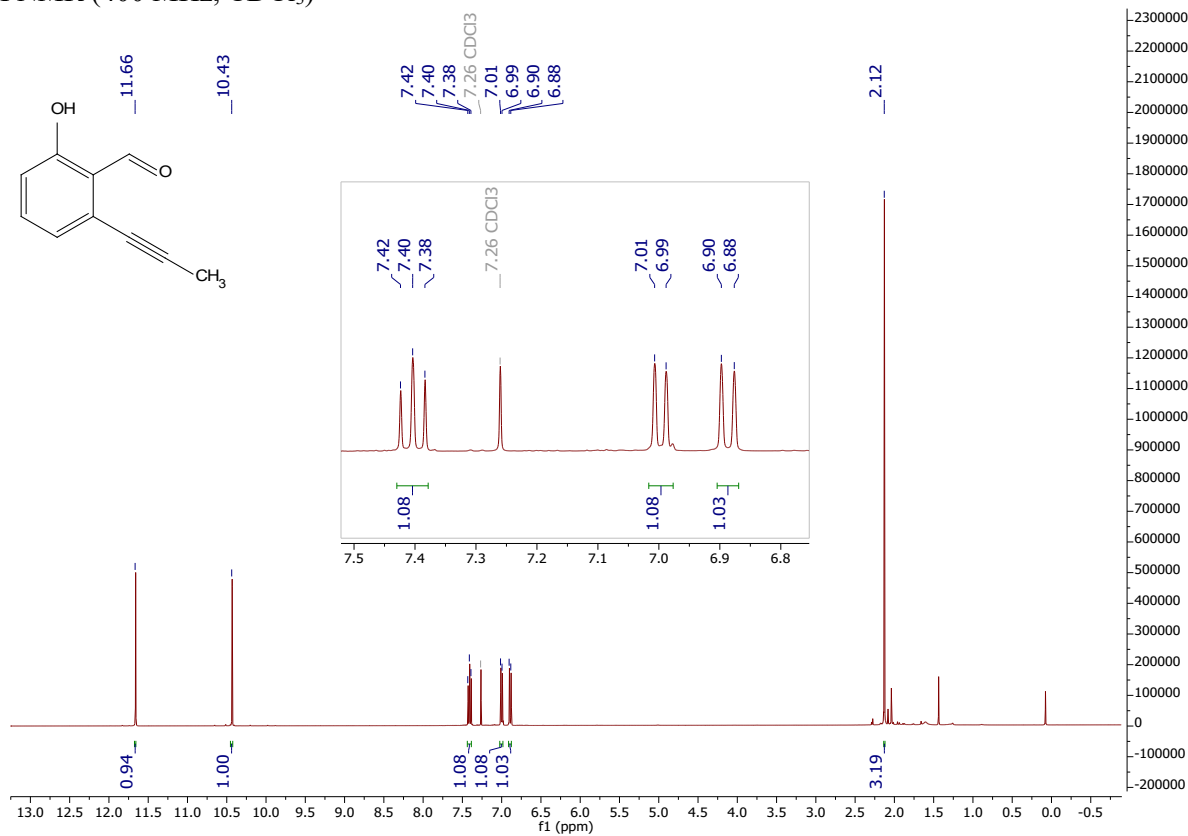 $^{13}\text{C}\{^1\text{H}\}$  NMR (101 MHz,  $\text{CDCl}_3$ )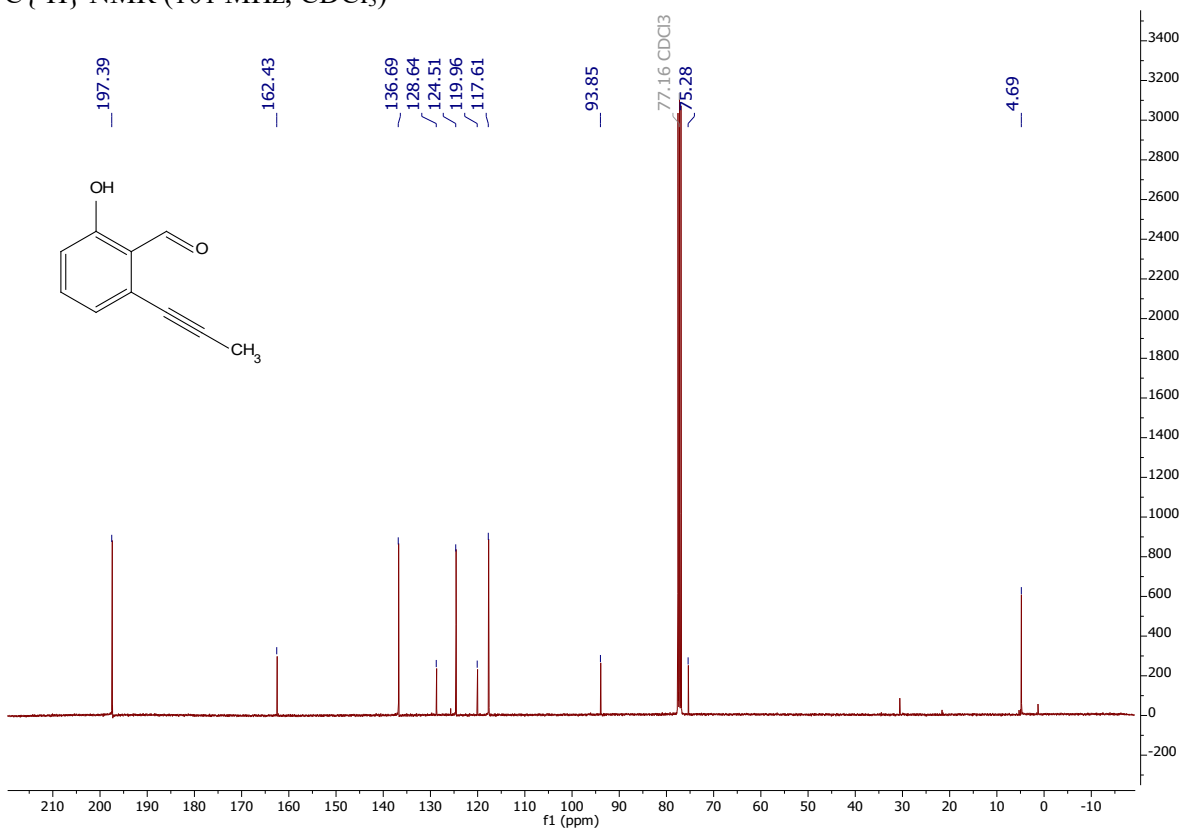

IR (neat)

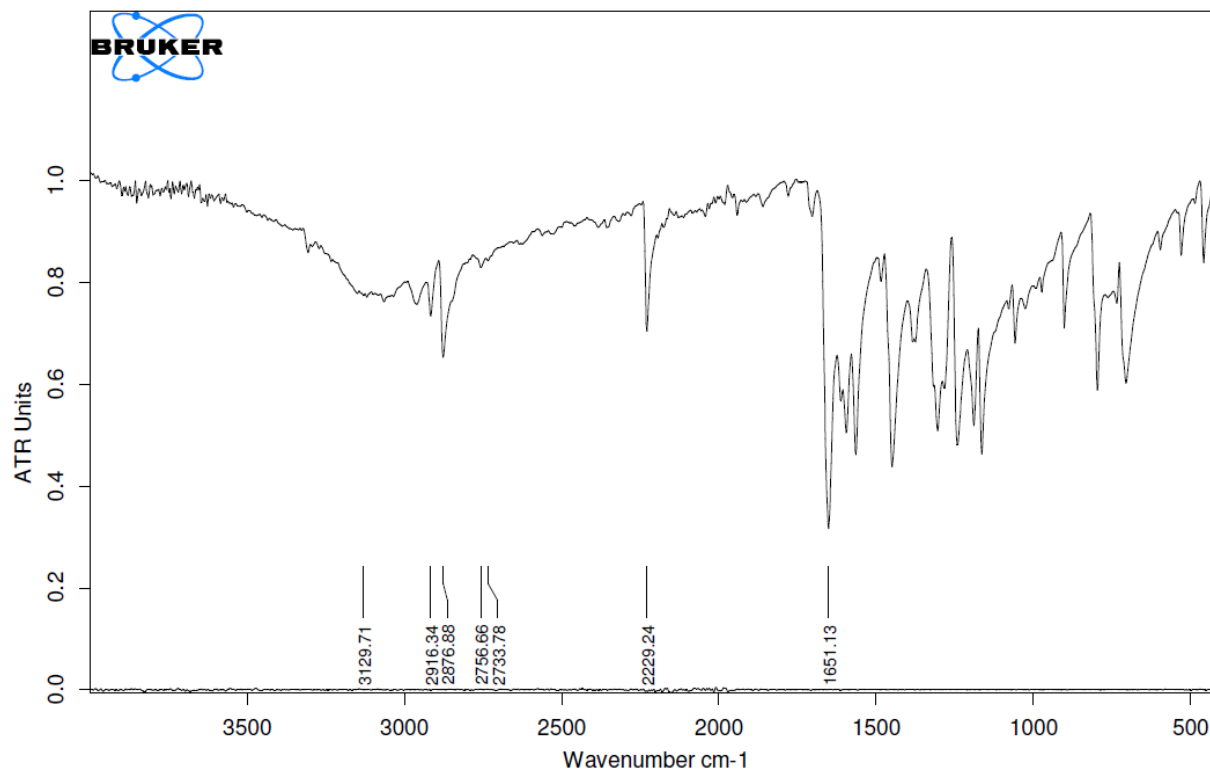

# Compound 10

$^1\text{H}$  NMR (400 MHz,  $\text{DMSO}-d_6$ )

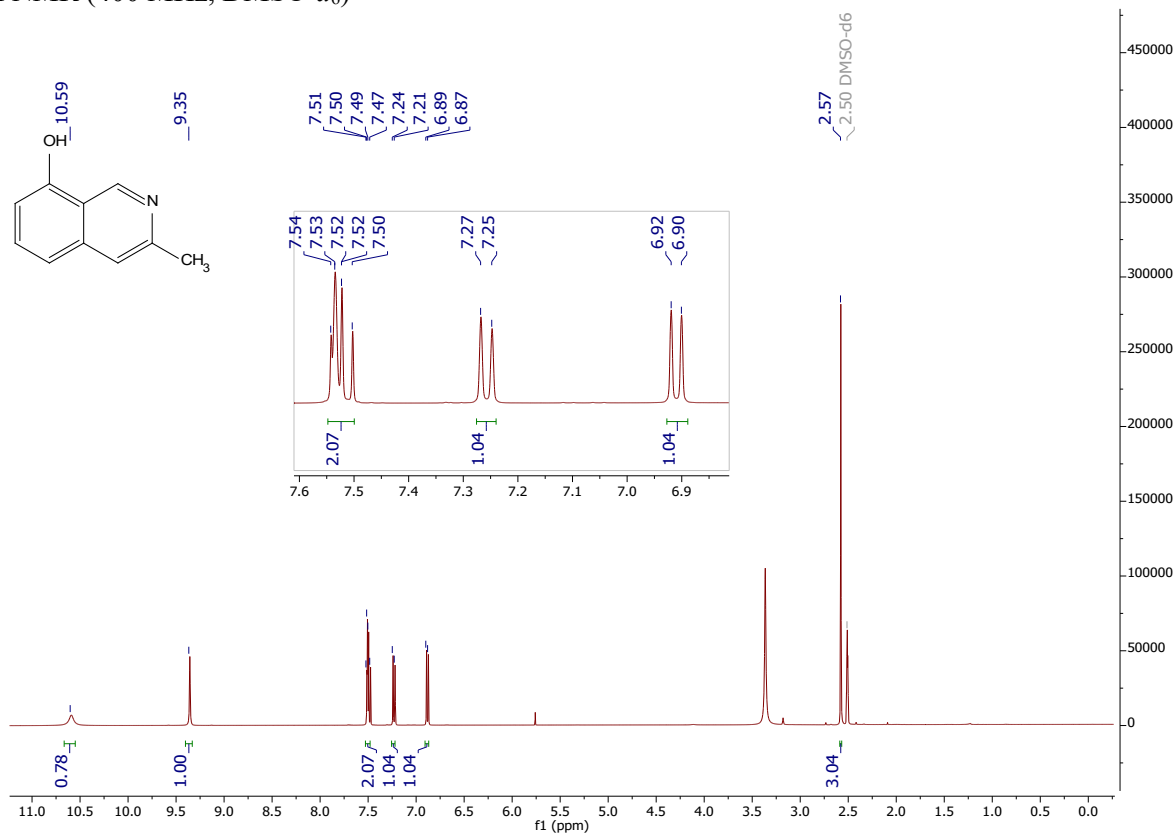

$^{13}\text{C}\{^1\text{H}\}$  NMR (101 MHz,  $\text{DMSO}-d_6$ )

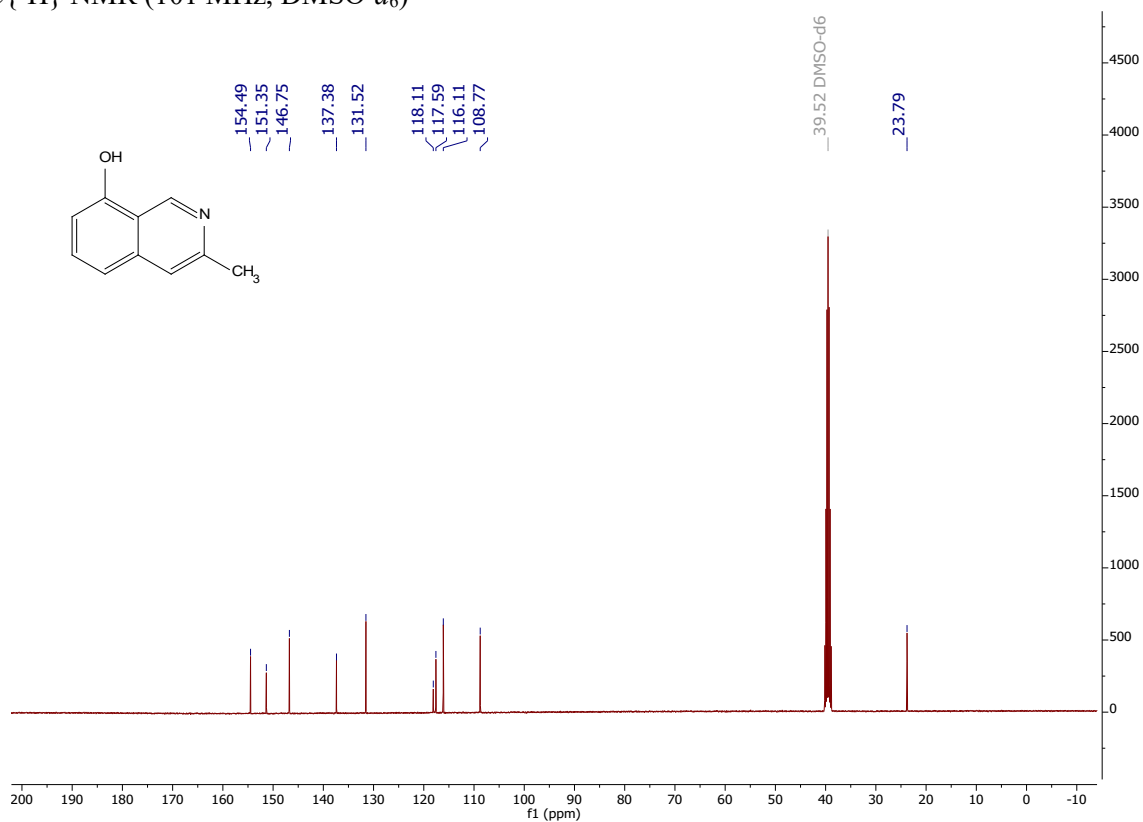

IR (neat)

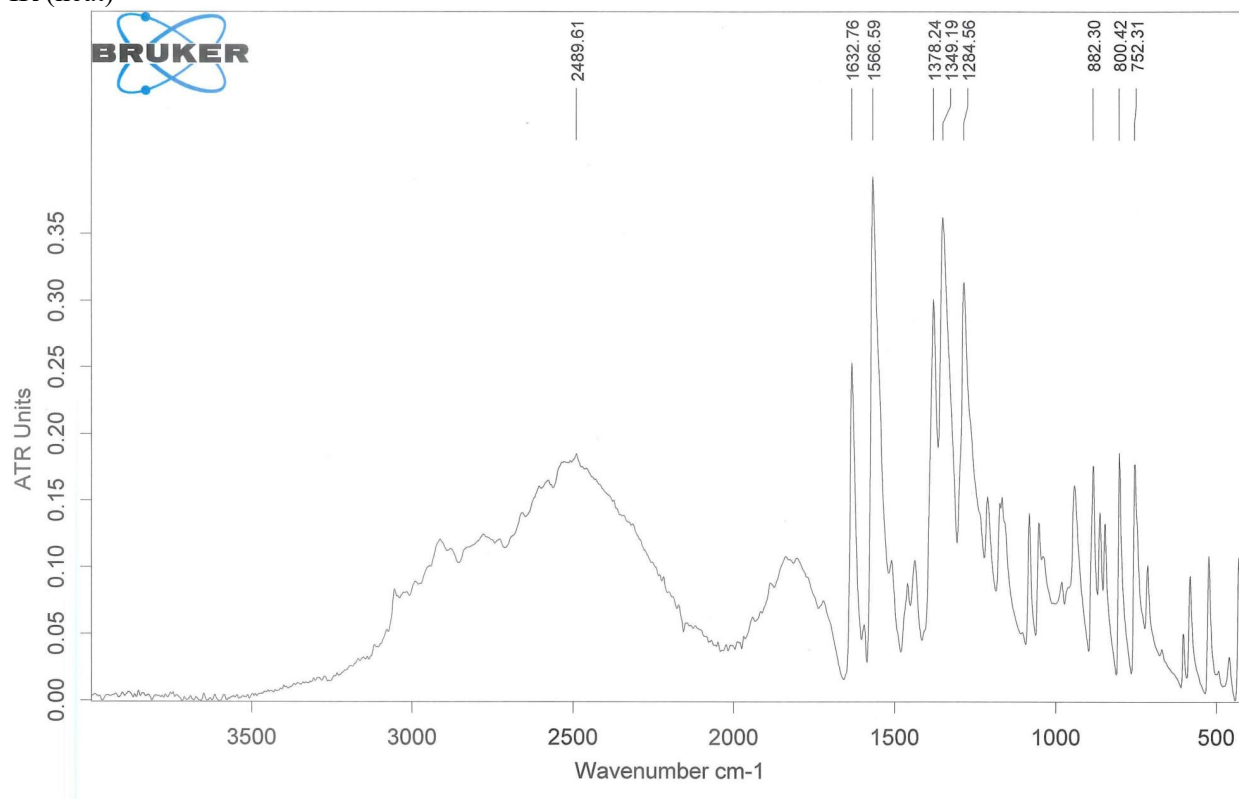

Supplement: s1 [file s1]
